# Supplementary material for: Protein Kinase C (Pkc)-δ Mediates Arginine-Induced Glucagon Secretion in Pancreatic α-Cells
Source: MDPI journal article supplement (doi:10.3390/ijms23074003), 2022-04-04
Supplement: s1 [file s1]

# Protein kinase C (Pkc)- $\delta$ mediates arginine-induced glucagon secretion in pancreatic $\alpha$ -cells

Norikiyo Honzawa <sup>1,3</sup>, Kei Fujimoto <sup>2\*</sup>, Masaki Kobayashi <sup>3</sup>, Daisuke Kohno <sup>3</sup>, Osamu Kikuchi <sup>3</sup>, Hiromi Yokota-Hashimoto <sup>3</sup>, Eri Wada <sup>3</sup>, Yuichi Ikeuchi <sup>3</sup>, Yoko Tabei <sup>3</sup>, Gerald W. Dorn II <sup>4</sup>, Kazunori Utsunomiya <sup>1</sup>, Rimei Nishimura <sup>1</sup>, and Tadahiro Kitamura <sup>3\*</sup>

<sup>1</sup> Division of Diabetes, Metabolism and Endocrinology, Department of Internal Medicine, Jikei University School of Medicine, 3-25-8 Nishishinbashi, Minato-ku, Tokyo 105-8461, Japan; mam-noon.am.m.m.h.m@gmail.com (N.H.); kazu-utsunomiya@jikei.ac.jp (K.U.); rimei@jikei.ac.jp (R.N.)

<sup>2</sup> Division of Diabetes, Metabolism and Endocrinology, Department of Internal Medicine, Jikei University Daisan Hospital, 4-11-1, Izumihoncho, Komae-shi, Tokyo 201-8601, Japan; fuji@jikei.ac.jp (K.F.)

<sup>3</sup> Metabolic Signal Research Center, Institute for Molecular and Cellular Regulation, Gunma University, 3-39-15 Showa-machi, Maebashi, Gunma 371-8512, Japan; masakikobayashi@gunma-u.ac.jp (M.K.); daisuke.kohno@gunma-u.ac.jp (D.K.); m10702010@gunma-u.ac.jp (O.K.); hiyokota@gunma-u.ac.jp (H.Y.-H.); wada@riem.nagoya-u.ac.jp (E.W.); m1920045@gunma-u.ac.jp (Y.I.); tabei-y@gunma-u.ac.jp (Y.T.); kitamura@gunma-u.ac.jp (T.K.)

<sup>4</sup> Center for Pharmacogenomics and Division of Cardiology, Department of Internal Medicine, Washington University School of Medicine, St. Louis, MO 63110, USA; gdorn@dom.wustl.edu (G.W.D.)

\* Correspondence: kitamura@gunma-u.ac.jp (T.K.); Tel.: +81-27-220-8849, fuji@jikei.ac.jp (K.F.); Tel.: +81-3-3480-1151

**Supplementary Figure 1.** Glucagon staining with rat monoclonal anti-glucagon antibody in GFP-positive  $\alpha$ -cells in *Gcg<sup>gfp/+</sup>* and *Gcg<sup>gfp/gfp</sup>* mice. Pancreatic sections of *Gcg<sup>gfp/+</sup>* and *Gcg<sup>gfp/gfp</sup>* mice were stained with rat monoclonal anti-glucagon antibody. Although glucagon signals perfectly colocalized with GFP in the *Gcg<sup>gfp/+</sup>* mice, glucagon was undetected in GFP-positive  $\alpha$ -cells in *Gcg<sup>gfp/gfp</sup>* mice, indicating a high specificity of glucagon antibody used in this study. Glucagon is shown in red and DAPI in blue. Scale bar represents 50  $\mu$ m. These studies were performed under blinded analysis.

**Supplementary Figure 2.** Characterization of pancreatic  $\alpha$ -cell-specific Pkc $\delta$  knockout mice. **a–c** Body weights (a) and blood glucose levels during intraperitoneal glucose (1 g/kg) tolerance test (b) and intraperitoneal insulin (0.75 U/kg) tolerance test (c) were similar to  $\alpha$ Pkc $\delta$ KO and control mice.  $n = 10$ , each group. \*  $p < 0.05$ ; t-test. Data are expressed as a box plot.  $\alpha$ Pkc $\delta$ KO indicates *Gcg<sup>CreERT2/+</sup>; Prkcd<sup>flox/flox</sup>* mice and Cont indicates *Gcg<sup>+/+</sup>; Prkcd<sup>flox/flox</sup>* mice. **d** Pancreatic sections of  $\alpha$ Pkc $\delta$ KO and control mice were subjected to Immunohistochemistry with rat monoclonal anti-glucagon and anti-insulin antibodies. glucagon is shown in red, insulin is shown in green, and DAPI is shown in blue. Scale bars represent 30  $\mu$ m. These studies were performed under blinded analysis. **e–g** Pancreatic  $\alpha$ -cell area (e),  $\beta$ -cell area (f), and the percentage of the  $\alpha$ -cell area against the  $\beta$ -cell area (g) were similar to  $\alpha$ Pkc $\delta$ KO and control mice.  $n = 4$ , each group. \*  $p < 0.05$ ; t-test. Data are expressed as means  $\pm$  SEM.  $\alpha$ Pkc $\delta$ KO indicates *Gcg<sup>CreERT2/+</sup>; Prkcd<sup>flox/flox</sup>* mice and Cont indicates *Gcg<sup>+/+</sup>; Prkcd<sup>flox/flox</sup>* mice.

**Supplementary Figure 3.** Plasma insulin levels in pancreatic  $\alpha$ -cell-specific Pkc $\delta$  knockout mice. **a–c** No significant differences in fasting (a), random-fed (b), and arginine-induced (c, 15 min after 3 g/kg arginine intraperitoneal administration) plasma insulin levels between  $\alpha$ Pkc $\delta$ KO and control mice.  $n = 10$ , each group. \*  $p < 0.05$ ; t-test. Data are expressed as a box plot.  $\alpha$ Pkc $\delta$ KO indicates *Gcg<sup>CreERT2/+</sup>; Prkcd<sup>flox/flox</sup>* mice and Cont indicates *Gcg<sup>+/+</sup>; Prkcd<sup>flox/flox</sup>* mice.
