# Supplementary material for: Protein Kinase C (Pkc)-δ Mediates Arginine-Induced Glucagon Secretion in Pancreatic α-Cells
Source: Int J Mol Sci. 2022 Apr 4;23(7):4003. doi: 10.3390/ijms23074003 (PMC8999522; doi:10.3390/ijms23074003)
Supplement: Supplementary file 1 [file ijms-23-04003-s001.zip]

Archive with 4 entries (4 files):
- Supplementary Figure/Supplementary Figure 1.tif
- Supplementary Figure/Supplementary Figure 2.tif
- Supplementary Figure/Supplementary Figure 3.tif
- Supplementary Figure/Supplementary Figure information.pdf
